# Supplementary material for: Synergetic effect of NH 3 and NO x on the production and optical absorption of secondary organic aerosol formation from toluene photooxidation
Source: Copernicus journal article supplement (doi:10.5194/acp-2021-560), 2021-07-22
Supplement: Supplementary file 1 [file acp-2021-560-supplement.pdf]

Supporting Information for

Synergetic effect of NH<sub>3</sub> and NO<sub>x</sub> on the  
production and optical absorption of secondary  
organic aerosol formation from toluene  
photooxidation

Shijie Liu <sup>a</sup>, Dandan Huang <sup>b</sup>, Yiqian Wang <sup>a</sup>, Si Zhang <sup>a</sup>, Can Wu <sup>a</sup>, Wei Du <sup>a</sup>, Gehui Wang <sup>a,c,\*</sup>

<sup>a</sup> *Key Lab of Geographic Information Science of the Ministry of Education, School of Geographic Sciences, East China Normal University, Shanghai 210062, China*

<sup>b</sup> *State Environmental Protection Key Laboratory of Formation and Prevention of the Urban Air Pollution Complex, Shanghai Academy of Environmental Sciences, Shanghai 200233, China*

<sup>c</sup> *Institute of Eco-Chongming, 3663 North Zhongshan Road, Shanghai 200062, China*

Corresponding author: Prof. Gehui Wang, e-mail: [ghwang@geo.ecnu.edu.cn](mailto:ghwang@geo.ecnu.edu.cn)

Positive matrix factorization (PMF) is a receptor model and multivariate factor analysis tool (Paatero and Tapper, 1994; Paatero, 1997). Recently, the PMF model was used to provide better separation of different organic components through high-resolution (HR) mass spectra data (Liu et al., 2014). This model was expressed as below:

$$x_{ij} = \sum_p g_{ip} f_{pj} + e_{ij}$$

where  $i$  and  $j$  refer to values of  $j$  species in  $i$  samples, respectively,  $p$  is the number of factors, and used a least-squares fitting process, minimizing a quality of fit parameter.

In our study, CU AMS PMF Execute Tool v 3.04A, which was developed by Ulbrich et al. (Ulbrich et al., 2009), was used for the PMF analysis. High-resolution ion fragments at  $m/z$  from 12-160 were used. We generated the organic data matrices and the corresponding error matrices from PIKA v 1.15D. Ions were classified and down-weighted according to the signal-to-noise ratios (SNR).  $0.2 < \text{SNR} < 2$  was classified as the weak ions and down-weighted by a factor of 2,  $\text{SNR} < 0.2$  was bad ions and removed from the analysis. Since  $\text{O}^+$ ,  $\text{HO}^+$ ,  $\text{H}_2\text{O}^+$  and  $\text{CO}^+$  are related proportionally only to  $\text{CO}_2^+$  in the fragmentation table, the error values for each of these  $m/z$  were multiplied to avoid excessive weighting of  $\text{CO}_2^+$ . The data were analyzed using the PMF2 algorithm (Paatero et al., 2002) with  $f_{\text{peak}}$  varying between -1 and 1.

A summary of the PMF results is presented in Fig. S1-S3. After an extensive evaluation of the mass spectral profiles and time series of different number of factors and the rotational forcing parameter,  $f_{\text{Peak}}$ , the 2-factor solution with  $f_{\text{Peak}} = 0$  was chosen for toluene SOA. The OA components of the 2-factor solution solved under different  $f_{\text{Peak}}$  values show very similar mass spectral patterns.

The direct comparisons of the mass spectra and time series of 3-factor solution are shown in Fig. S4. The 3-factor solution splits the High-nitrogen OA (Hi-NOA) into two components for which we cannot offer a physically meaningful interpretation. While the results of 2-factor solution are also used in the familiar chamber study (Chen et al., 2021; Chen et al., 2019). We therefore choose the 2-factor solution.

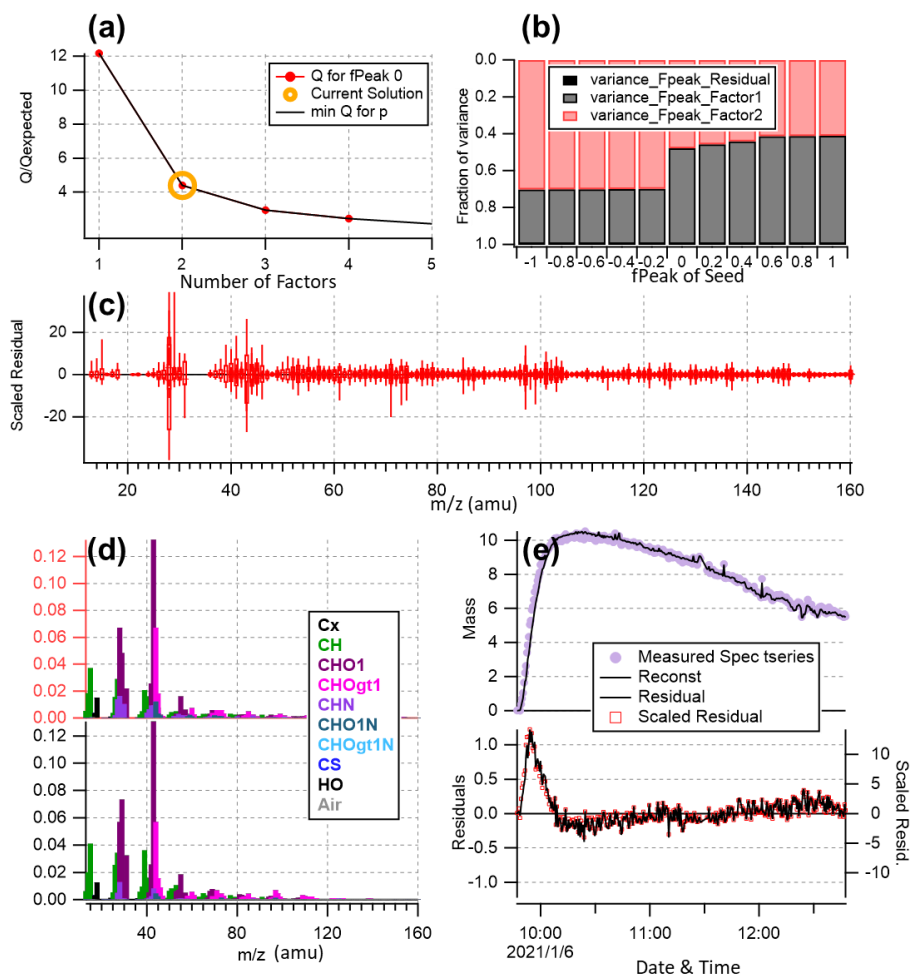

Fig. S1 The 2-factor solution for the toluene OH-oxidation in the presence of NH<sub>3</sub>.

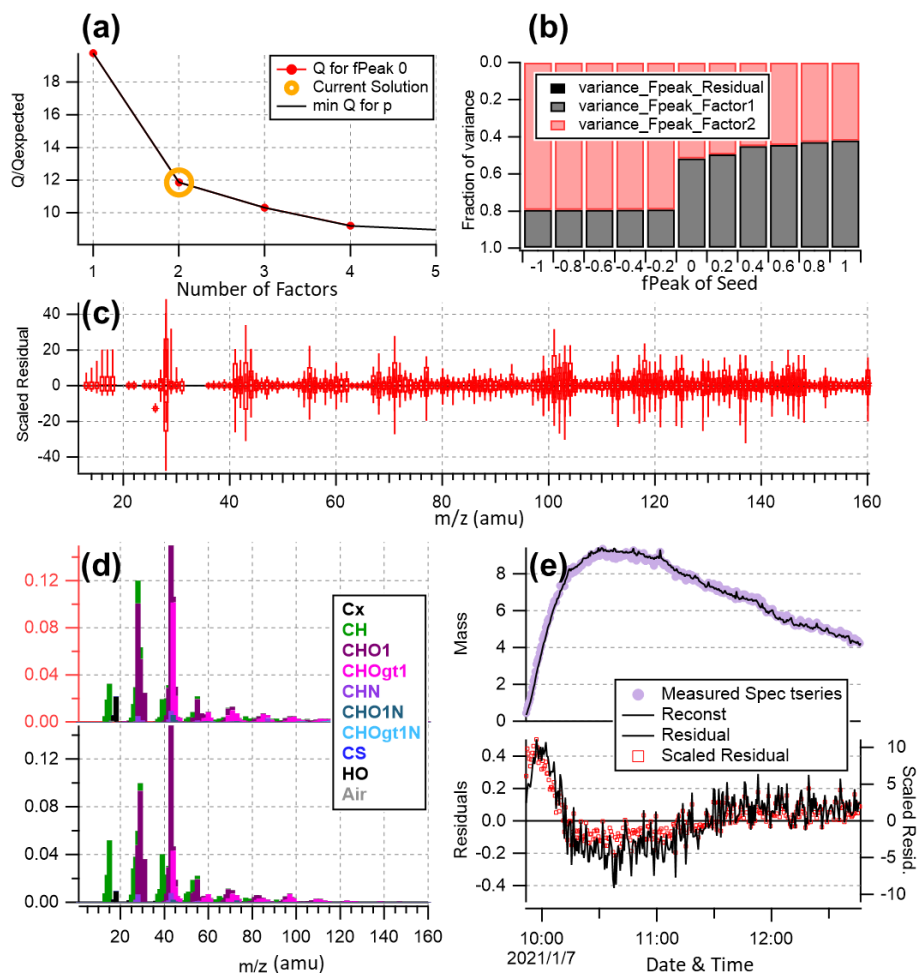

Fig. S2 The 2-factor solution for the toluene OH-oxidation in the presence of NO<sub>x</sub>.

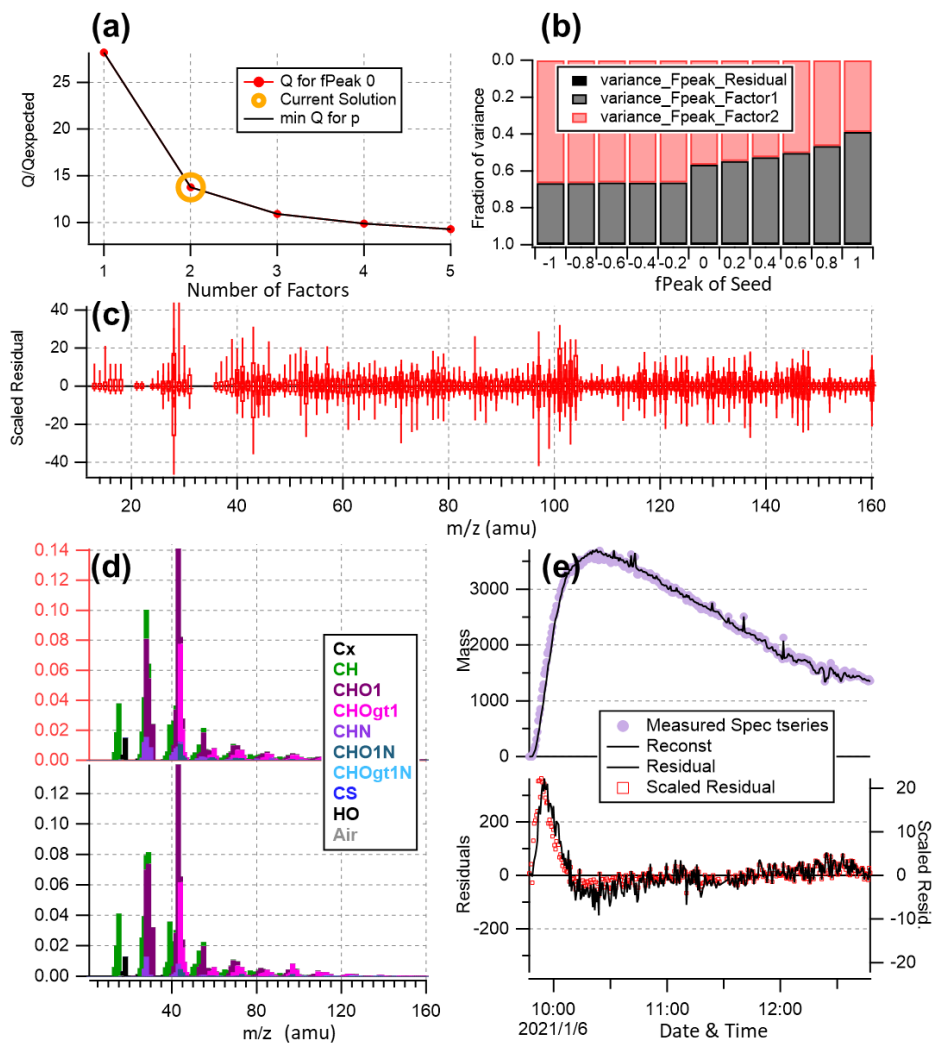

Fig. S3 The 2-factor solution for the toluene OH-oxidation in the presence of both NO<sub>x</sub> and NH<sub>3</sub>.

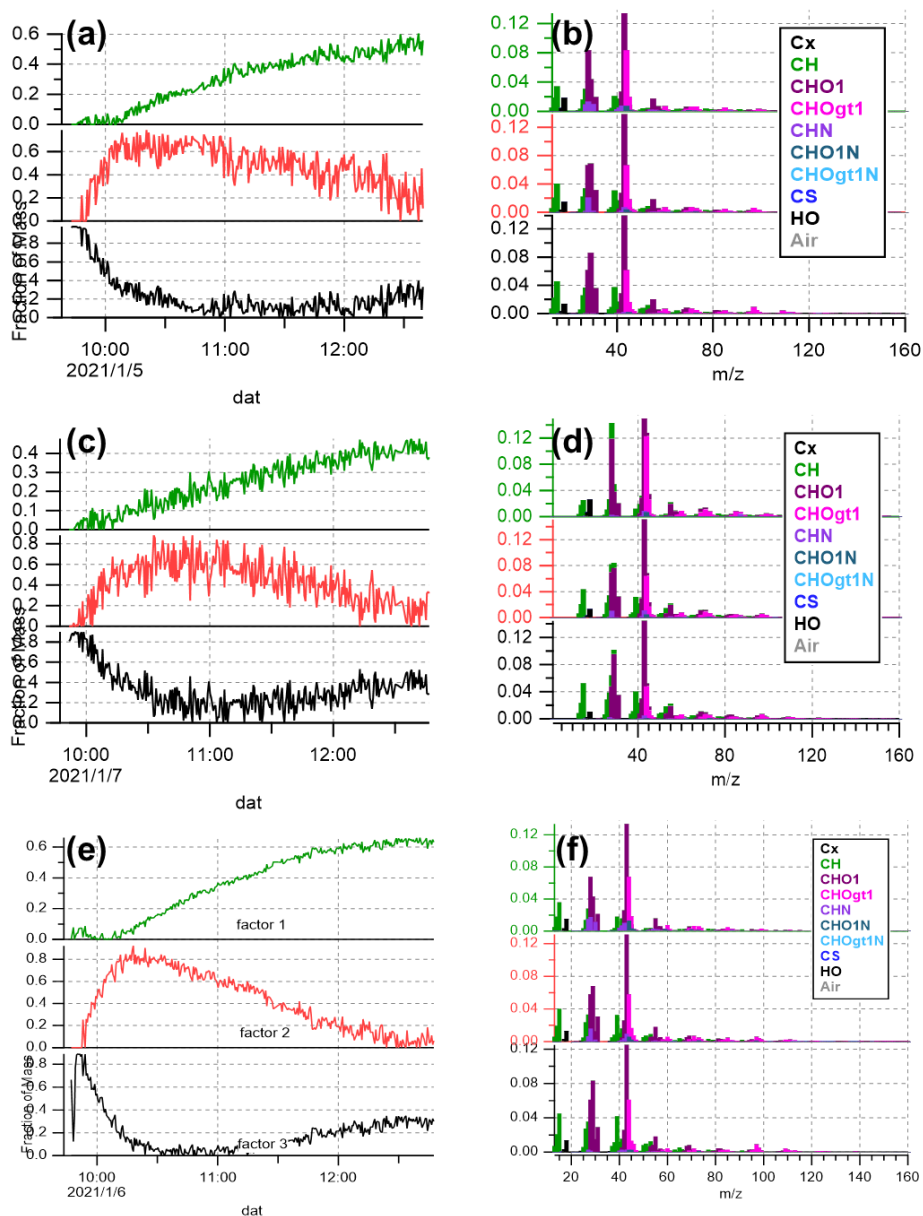

Fig. S4 (a), (c), and (e): High resolution mass spectra 3-factor solution for the Exp.2, 3, and 4, respectively. (b), (d), and (f): Time series of mass concentration of OA in each factor.

#### Reference:

Chen, T. Z., Liu, Y. C., Ma, Q. X., Chu, B. W., Zhang, P., Liu, C. G., Liu, J., and He, H.: Significant source of secondary aerosol: formation from gasoline evaporative emissions in the presence of SO<sub>2</sub> and NH<sub>3</sub>, *Atmos. Chem. Phys.*, 19, 8063-8081, 10.5194/acp-19-8063-2019, 2019.

Chen, T. Z., Chu, B. W., Ma, Q. X., Zhang, P., Liu, J., and He, H.: Effect of relative humidity on SOA formation from aromatic hydrocarbons: Implications from the evolution of gas- and particle-phase species, *Sci. Total. Environ.*, 773, 145015, 10.1016/j.scitotenv.2021.145015, 2021.

- Liu, Y., Li, S. M., and Liggió, J.: Technical Note: Application of positive matrix factor analysis in heterogeneous kinetics studies utilizing the mixed-phase relative rates technique, *Atmos. Chem. Phys.*, 14, 9201-9211, 10.5194/acp-14-9201-2014, 2014.
- Paatero, P., and Tapper, U.: Positive matrix factorization: A non-negative factor model with optimal utilization of error estimates of data values, *Environmetrics*, 5, 111-126, 10.1002/env.3170050203, 1994.
- Paatero, P.: Least squares formulation of robust non-negative factor analysis, *Chemometr. Intell. Lab.*, 37, 23-35, Doi 10.1016/S0169-7439(96)00044-5, 1997.
- Paatero, P., Hopke, P. K., Song, X. H., and Ramadan, Z.: Understanding and controlling rotations in factor analytic models, *Chemometrics and Intelligent Laboratory Systems*, 60, 253-264, Doi 10.1016/S0169-7439(01)00200-3, 2002.
- Ulbrich, I. M., Canagaratna, M. R., Zhang, Q., Worsnop, D. R., and Jimenez, J. L.: Interpretation of organic components from Positive Matrix Factorization of aerosol mass spectrometric data, *Atmos. Chem. Phys.*, 9, 2891-2918, 10.5194/acp-9-2891-2009, 2009.
